# Supplementary material for: The Pivotal Role of Host Organizations in Enhancing Mentoring in Internal Medicine: A Scoping Review
Source: PubMed Central journal article supplement (PMC7536487; doi:10.1177/2382120520956647), 2020-09-30
Supplement: Supplementary_material.pdf [file Supplementary_material.pdf]

## **Appendices**

### *Appendix A – PubMed Search Strategy*

(mentoring[MeSH] OR mentors[MeSH] OR mentor[tiab] OR mentors[tiab] OR mentoring[tiab] OR mentorship[tiab] OR “mentoring structure”[tiab] OR “mentoring structures”[tiab] OR “mentoring relationship”[tiab] OR “mentoring relationships”[tiab] OR “mentoring environment”[tiab] OR “mentoring environments”[tiab]) AND (“Schools, Medical”[MeSH] OR “Medicine”[MeSH] OR “Students, Medical”[MeSH] OR “medical student”[tiab] OR “medical students”[tiab] OR “medical school”[tiab] OR “medical schools”[tiab] OR medicine[tiab])

*Appendix B – Characteristics of Included Articles*

***Types of Papers***

| <b>Type of Paper</b>               | <b>Number</b> | <b>Papers</b>                                                                                                                                                                                                                                                                                                                                                                                                                                                                                           |
|------------------------------------|---------------|---------------------------------------------------------------------------------------------------------------------------------------------------------------------------------------------------------------------------------------------------------------------------------------------------------------------------------------------------------------------------------------------------------------------------------------------------------------------------------------------------------|
| Qualitative                        | 12            | Arnold et al. 2017<br>Bhatia et al. 2013<br>Dobie et al. 2010<br>Harrison et al. 2014<br>Haueret al. 2005<br>Jackson et al. 2003<br>Kalén et al. 2015<br>Kalén et al. 2012<br>Stenfors-Hayes et al. 2010<br>Straus et al. 2009<br>Straus et al. 2013<br>Thomas-MacLean et al. 2011                                                                                                                                                                                                                      |
| Quantitative                       | 22            | Spence et al. 2018<br>Manabe et al. 2018<br>DeFilippis et al. 2016<br>Devi et al. 2010<br>Fleming et al. 2013<br>Goldszmidt et al. 2009<br>Han et al. 2014<br>Kwan et al. 2015<br>Lin et al. 2015<br>Longo et al. 2011<br>Luckhaupt et al. 2005<br>Ludwig et al. 2018<br>Miedzinski et al. 2009<br>Morrison et al. 2014<br>Ramanan et al. 2006<br>Sakushima et al. 2015<br>Schmidt et al. 2010<br>Sheikh et al. 2017<br>Sozio et al. 2017<br>Stamm et al. 2011<br>Sayan et al. 2019<br>Elez et al. 2018 |
| Mixed qualitative and quantitative | 13            | Coates et al. 2008<br>Dimitriadis et al. 2012<br>Fornari et al. 2014<br>Hawkins et al. 2014<br>Ho et al. 2017<br>Iversen et al. 2014<br>Kalén et al. 2010<br>Kukreja et al. 2017<br>Meinel et al. 2011<br>Schaferet al. 2015<br>Usmani et al. 2011<br>von der Borch et al. 2011<br>Winston et al. 2012                                                                                                                                                                                                  |
| Descriptive                        | 5             | Larkin et al. 2003<br>Mark et al. 2001<br>Sanfey et al. 2013<br>Shamim et al. 2013<br>Srinivasan et al. 2011                                                                                                                                                                                                                                                                                                                                                                                            |
| Report                             | 8             | Boninger et al. 2010<br>Gotterer et al. 2010                                                                                                                                                                                                                                                                                                                                                                                                                                                            |

|                   |    |                                                                                                                                                                                                                        |
|-------------------|----|------------------------------------------------------------------------------------------------------------------------------------------------------------------------------------------------------------------------|
|                   |    | Levy et al. 2004<br>Pinilla et al. 2015<br>Rothberg et al. 2014<br>Thomas-Squance et al. 2011<br>Zier et al. 2009<br>Zuzuarregui et al. 2015                                                                           |
| Editorial         | 2  | Dzau et al. 2015<br>Toklu et al. 2017                                                                                                                                                                                  |
| Perspective       | 1  | Fraser et al. 2004                                                                                                                                                                                                     |
| Systematic Review | 10 | Beech et al. 2013<br>Frei et al. 2010<br>Guraya et al. 2016<br>Ikbalet al. 2017<br>Kashiwagi et al. 2013<br>Sambunjak et al. 2010<br>Sambunjak et al. 2010<br>Sng et al. 2017<br>Tan et al. 2018<br>Farkas et al. 2019 |
| Literature Review | 3  | Buddeberg-Fischer et al. 2006<br>Davis et al. 2010<br>Ottenheijm et al. 2008                                                                                                                                           |

| <b>Time Point of Paper</b> | <b>Number</b> | <b>Papers</b>                                                                                                                                                                                                                                                                                                                                                                                                                                                                                                                                                                                                                                                                                                                                                                               |
|----------------------------|---------------|---------------------------------------------------------------------------------------------------------------------------------------------------------------------------------------------------------------------------------------------------------------------------------------------------------------------------------------------------------------------------------------------------------------------------------------------------------------------------------------------------------------------------------------------------------------------------------------------------------------------------------------------------------------------------------------------------------------------------------------------------------------------------------------------|
| Retrospective              | 42            | Arnold et al. 2017<br>Bhatia et al. 2013<br>DeFilippis et al. 2016<br>Devi et al. 2010<br>Dobie et al. 2010<br>Fomari et al. 2014<br>Goldszmidt et al. 2009<br>Han et. al 2014<br>Harrison et al. 2014<br>Hauer et al. 2005<br>Hawkins et al. 2014<br>Ho et al. 2017<br>Iversen et al. 2014<br>Jackson et al. 2003<br>Kalén et al. 2015<br>Kalén et al. 2012<br>Kalén et al. 2010<br>Kukreja et al. 2017<br>Kwan et al. 2015<br>Longo et al. 2011<br>Luckhaupt et al. 2005<br>Ludwig et al. 2018<br>Meinel et al. 2011<br>Miedzinski et al. 2009<br>Morrison et al. 2014<br>Ramanan et al. 2006<br>Sakushima et al. 2015<br>Schafer et al. 2015<br>Schmidt et al. 2010<br>Sheikh et al. 2017<br>Sozio et al. 2017<br>Stenfors-Hayes et al. 2010<br>Straus et al. 2009<br>Straus et al. 2013 |

|             |   |                                                                                                                                                                                           |
|-------------|---|-------------------------------------------------------------------------------------------------------------------------------------------------------------------------------------------|
|             |   | Thomas-MacLean et al. 2011<br>Usmani et al. 2011<br>von der Borch et al. 2011<br>Winston et al. 2012<br>Tan et al. 2018<br>Spence et al. 2018<br>Manabe et al. 2018<br>Farkas et al. 2019 |
| Prospective | 7 | Coates et al. 2008<br>Dimitriadis et al. 2012<br>Fleming et al. 2013<br>Lin et al. 2015<br>Stamm et al. 2011<br>Sayan et al. 2019<br>Elez et al. 2018                                     |

***Who were interviewed/ surveyed?***

| <b>Addressed</b> | <b>Number</b> | <b>Papers</b>                                                                                                                                                                                                                                                                                                                                                                                                                                                                                                                                                                                                                                                                                                                                                         |
|------------------|---------------|-----------------------------------------------------------------------------------------------------------------------------------------------------------------------------------------------------------------------------------------------------------------------------------------------------------------------------------------------------------------------------------------------------------------------------------------------------------------------------------------------------------------------------------------------------------------------------------------------------------------------------------------------------------------------------------------------------------------------------------------------------------------------|
| Mentors          | 6             | Dobie et al. 2010<br>Jackson et al. 2003<br>Luckhaupt et al. 2005<br>Stenfors-Hayes et al. 2010<br>Usmani et al. 2011<br>Elez et al. 2018                                                                                                                                                                                                                                                                                                                                                                                                                                                                                                                                                                                                                             |
| Mentees          | 34            | Arnold et al. 2017<br>Boninger et al. 2010<br>Coates et al. 2008<br>DeFilippis et al. 2016<br>Devi et al. 2010<br>Dimitriadis et al. 2012<br>Goldszmidt et al. 2009<br>Gotterer et al. 2010<br>Han et al. 2014<br>Harrison et al. 2014<br>Hauer et al. 2005<br>Ho et al. 2017<br>Kalén et al. 2015<br>Kalén et al. 2012<br>Kalén et al. 2010<br>Kwan et al. 2015<br>Levy et al. 2004<br>Lin et al. 2015<br>Ludwig et al. 2018<br>Morrison et al. 2014<br>Pinilla et al. 2015<br>Ramanan et al. 2006<br>Rothberg et al. 2014<br>Sakushima et al. 2015<br>Schafer et al. 2015<br>Schmidt et al. 2010<br>Sozio et al. 2017<br>Stamm et al. 2011<br>Thomas-Squance et al. 2011<br>Zier et al. 2009<br>Zuzuarregui et al. 2015<br>Manabe et al. 2018<br>Spence et al. 2018 |

|                                        |    |                                                                                                                                                                                                                                                                                                                                                                        |
|----------------------------------------|----|------------------------------------------------------------------------------------------------------------------------------------------------------------------------------------------------------------------------------------------------------------------------------------------------------------------------------------------------------------------------|
| Both mentees and mentors               | 12 | <p>Sayan et al. 2019</p> <p>Bhatia et al. 2013</p> <p>Fleming et al. 2013</p> <p>Hawkins et al. 2014</p> <p>Kukreja et al. 2017</p> <p>Longo et al. 2011</p> <p>Miedzinski et al. 2009</p> <p>Sheikh et al. 2017</p> <p>Straus et al. 2009</p> <p>Straus et al. 2013</p> <p>Thomas-MacLean et al. 2011</p> <p>von der Borch et al. 2011</p> <p>Winston et al. 2012</p> |
| Host organization                      | 2  | <p>Fornari et al. 2014</p> <p>Meinel et al. 2011</p>                                                                                                                                                                                                                                                                                                                   |
| Mentees, mentors and host organization | 1  | Iversen et al. 2014                                                                                                                                                                                                                                                                                                                                                    |
